# Supplementary material for: A coumarin-based fluorescent probe for differential identification of sulfide and sulfite in CTAB micelle solution
Source: Royal Society of Chemistry journal article supplement (doi:10.1039/c4an00478g), 2014-01-01
Supplement: c4an00478g1.pdf [file c4an00478g1.pdf]

# A Coumarin-based Fluorescent Probe for Differential Identification of Sulfide and Sulfite in CTAB Micelle Solution

Haiyu Tian,<sup>†</sup> Junhong Qian,<sup>\*,†</sup> Qian Sun,<sup>†</sup> Chenjia Jiang,<sup>†</sup> Runsheng Zhang,<sup>‡</sup> and Weibing Zhang<sup>\*,†</sup>

<sup>†</sup>Shanghai Key Laboratory of Functional Materials Chemistry, School of Chemistry and Molecular Engineering, East China University of Science and Technology, Shanghai, 200237, China.

<sup>‡</sup>Shanghai Key Laboratory of Scene Material Evidence, Center of Material Evidence Identification, Shanghai Public Security Bureau, Shanghai, 200083, China.

junhongqian@ecust.edu.cn; weibingzhang@ecust.edu.cn

## Supporting Information

### Contents

|                                                                                                |    |
|------------------------------------------------------------------------------------------------|----|
| Synthesis-----                                                                                 | 2  |
| NMR and ESI spectra of <b>TSSP-N<sub>3</sub></b> and <b>TSSP-NH<sub>2</sub></b> -----          | 5  |
| Dynamic reaction curves of <b>TSSP-N<sub>3</sub></b> with sulfide and sulfite-----             | 7  |
| ESI of the reaction product between <b>TSSP-N<sub>3</sub></b> and sulfite-----                 | 8  |
| Time-dependent fluorescence spectra of <b>TSSP-N<sub>3</sub></b> -sulfide-sulfite-----         | 9  |
| The absorption and emission spectra of <b>TSSP-N<sub>3</sub></b> coexisted with sulfite-----   | 10 |
| Time-dependent UV-vis and fluorescence spectra of <b>TSSP-N<sub>3</sub></b> with sulfide ----- | 11 |
| Normalized absorption and emission spectra of <b>TSSP-N<sub>3</sub></b> -sulfide-----          | 12 |
| Living cell imaging-----                                                                       | 13 |

**Synthesis of the TSSP-N<sub>3</sub> and TSSP-NH<sub>2</sub>.** The synthesis procedures of **TSSP-N<sub>3</sub>** and **TSSP-NH<sub>2</sub>** are shown in Scheme 1. The experimental details are described as the following.

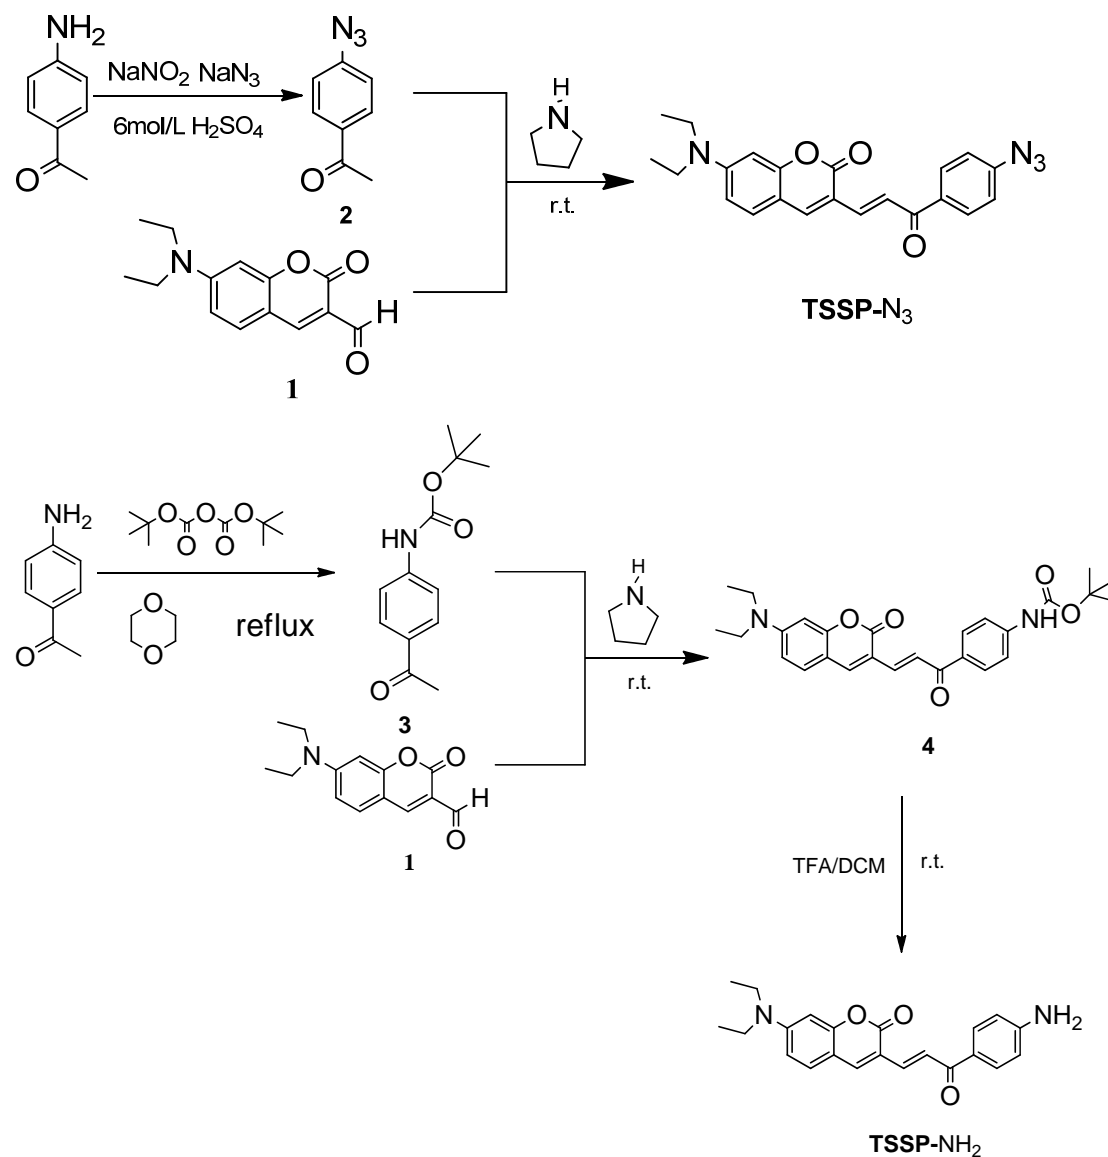

**Scheme 1.** Synthesis procedures of **TSSP-N<sub>3</sub>** and **TSSP-NH<sub>2</sub>**.

*Synthesis of Compound 2.* At 0-5°C, NaNO<sub>2</sub> aqueous solution (8.0 mL, 7.4 mmol) was dropwise added to a solution of 4-aminoacetophenone (500 mg, 3.77 mmol) in 20 mL H<sub>2</sub>SO<sub>4</sub> (6 mol/L); and the resulting solution was stirred for 30 min. 5 mL NaN<sub>3</sub> aqueous solution (7.4 mmol) was dropwise added to the above solution. After stirred for 12 hour at room temperature, the solvent was evaporated under vacuum, then the

crude product was purified with column chromatography (PE / DCM = 6:1) to give **2** as faint yellow solid (yield: 94%). <sup>1</sup>H NMR (400 MHz, CDCl<sub>3</sub>): 7.97 (d, J = 8.47 Hz, 2H), 7.09 (d, J = 8.47 Hz, 2H), 2.59 (s, 3H).

**TSSP-N<sub>3</sub>** was synthesized according to the reference<sup>10</sup>: 100 mg (0.4 mmol) of compound **1**, 0.72 mmol of compound **2** and five drops of pyrrolidine were added to 20 mL of EtOH/DCM (1:2, v/v). After stirred at room temperature for 48 hours, the solvent was evaporated under vacuum. The residual solid was purified with column chromatography (PE : DCM = 3:1) to afford **TSSP-N<sub>3</sub>** as salmon solid (yield: 45%). <sup>1</sup>H NMR (400 MHz, CDCl<sub>3</sub>): 8.23 (d, J = 15.20 Hz, 1H), 8.12 (d, J = 8.51 Hz, 2H), 7.79 (s, 1H), 7.64 (d, J = 15.19 Hz, 1H), 7.34 (d, J = 8.89 Hz, 1H), 7.12 (d, J = 8.52 Hz, 2H), 6.62 (dd, J = 5.55 Hz, 1H), 6.51 (d, J = 1.93 Hz, 1H), 3.47 (q, J = 7.08 Hz, 4H), 1.24 (t, J = 7.09 Hz, 6H). <sup>13</sup>C NMR (100 MHz, DMSO-*d*<sub>6</sub>): δ 187.8, 160.5, 157.0, 152.4, 146.2, 144.6, 139.9, 135.0, 131.2, 130.7, 120.9, 119.9, 113.6, 110.5, 108.8, 96.7, 44.8, 12.9; ESI (HR): *m/z* 411.1423 (M+Na)<sup>+</sup>, calculated 411.1433 for (M+Na)<sup>+</sup>.

*Synthesis of Compound 3.* The solution of 4-aminoacetophenone (900 mg, 6.66 mmol) and di-*tert*-butyl dicarbonate (1.89 g, 8.70 mmol) in dioxane (20 mL) was refluxed for 12 hours and cooled to room temperature. After removal of the solvent, the residual solid was purified with column chromatography (PE / DCM = 4:1) to give **3** as white solid (yield: 91%). <sup>1</sup>H NMR (400 MHz, CDCl<sub>3</sub>): 7.92 (d, J = 8.69 Hz, 2H), 7.45 (d, J = 8.66 Hz, 2H), 6.70 (s, 1H), 2.57 (s, 3H), 1.53 (s, 9H).

*Synthesis of Compound 4.* 100 mg (0.4 mmol) of compound **1**, 0.72 mmol of compound **3** and five drops of pyrrolidine were added to 20 mL of EtOH/DCM (1:2, v/v). After stirred at room temperature for 48 hours, the solvent was evaporated under vacuum. The residual solid was purified with column chromatography (PE : DCM = 4:1) to give **4** as salmon solid (yield: 40%). <sup>1</sup>H NMR (400 MHz, CDCl<sub>3</sub>): 8.23 (d, J = 15.19 Hz, 1H), 8.07 (d, J = 8.65 Hz, 2H), 7.78 (s, 1H), 7.63 (d, J = 15.20 Hz, 1H), 7.48 (d, J = 8.59 Hz, 2H), 7.34 (d, J = 8.92 Hz, 1H), 6.68 (s, 1H), 6.62 (dd, J = 6.63 Hz, 1H), 6.51 (d, J = 2.05 Hz, 1H), 3.47 (q, J = 7.03 Hz, 4H), 1.54 (s, 9H), 1.23 (t, J =

7.07 Hz, 6H).

*Synthesis of TSSP-NH<sub>2</sub>*. Trifluoroacetic acid (10  $\mu$ L) was added to a solution of **4** (30 mg, 65  $\mu$ mol) in CH<sub>2</sub>Cl<sub>2</sub> (10 mL). The mixture was stirred at room temperature for one hour. The solution was concentrated to dryness and the residue was purified with column chromatography (PE : DCM = 2:1) to give **TSSP-NH<sub>2</sub>** as salmon solid (yield: 90%). <sup>1</sup>H NMR (400 MHz, CDCl<sub>3</sub>): 8.24 (d, J = 15.22 Hz, 1H), 8.00 (d, J = 8.43 Hz, 2H), 7.76 (s, 1H), 7.59 (d, J = 15.26 Hz, 1H), 7.33 (d, J = 8.86 Hz, 1H), 6.70 (d, J = 8.43 Hz, 2H), 6.61 (dd, J = 5.45 Hz, 1H), 6.51 (d, J = 1.93 Hz, 1H), 4.13 (s, 2H), 3.47 (q, J = 7.08 Hz, 4H), 1.25 (t, J = 7.04 Hz, 6H). <sup>13</sup>C NMR (100 MHz, DMSO-*d*<sub>6</sub>):  $\delta$  187.1, 163.1, 160.1, 156.4, 151.7, 145.2, 138.4, 130.6, 130.5, 130.4, 120.8, 114.1, 113.3, 109.9, 108.3, 96.2, 44.3, 12.3. ESI (HR): *m/z* 363.1702 (M+H)<sup>+</sup>, calculated 363.1709 for (M+H)<sup>+</sup>.

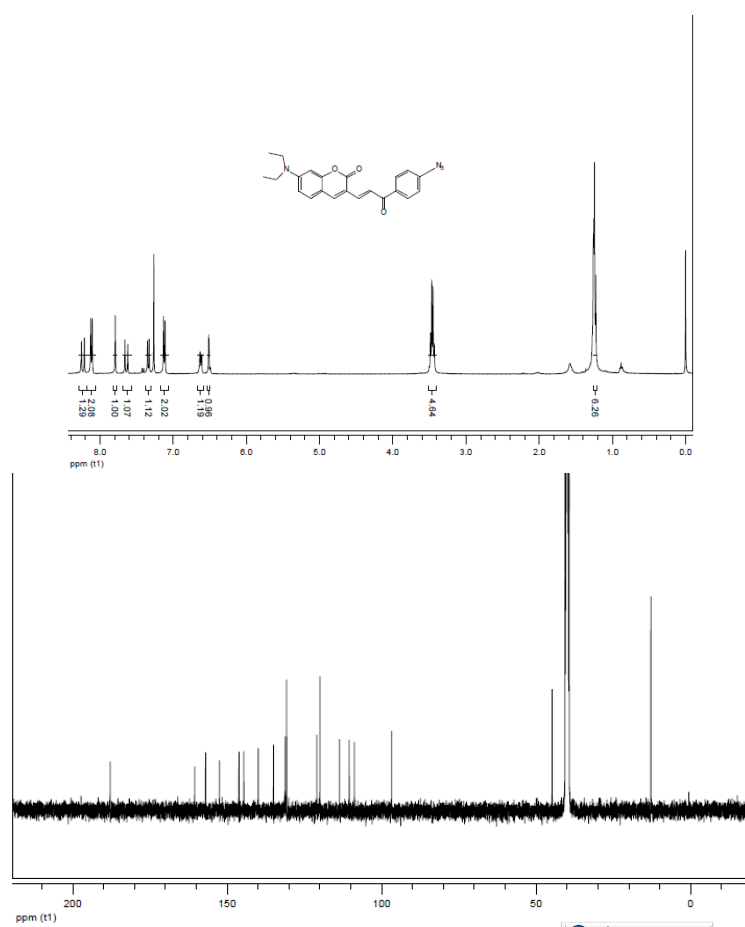

WB-ZHANG

ECUST Institute of Fine Chem

12-Dec-2013

ZWB-THY-TSSP-N3 27 (0.264) Cm (16:27)

19:14:31  
1: TOF MS ES+  
7.16e+003

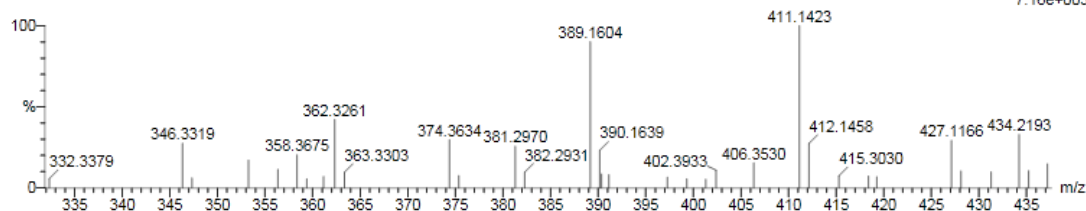

Minimum:

-1.5

Maximum:

30.0 50.0 100.0

| Mass     | Calc. Mass | mDa  | PPM  | DBE  | i-FIT | i-FIT (Norm) | Formula          |
|----------|------------|------|------|------|-------|--------------|------------------|
| 411.1423 | 411.1433   | -1.0 | -2.4 | 14.5 | 7.2   | 0.0          | C22 H20 N4 O3 Na |

**Figure S1.**  $^1\text{H}$  NMR,  $^{13}\text{C}$  NMR and HRMS spectra of TSSP-N<sub>3</sub>.

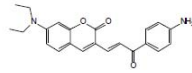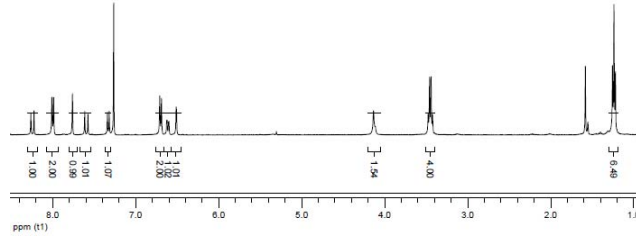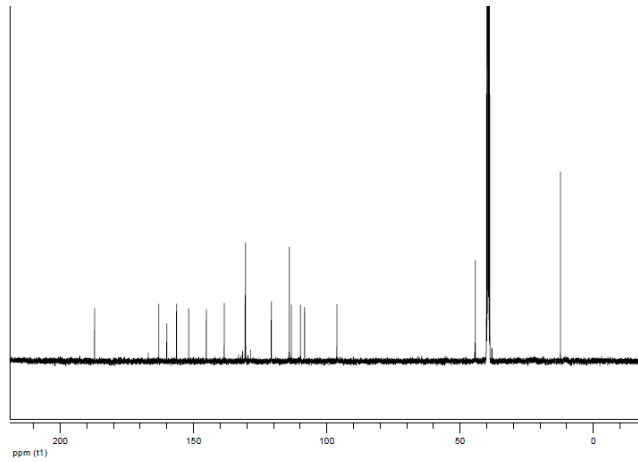

Monoisotopic Mass, Even Electron Ions

56 formula(e) evaluated with 3 results within limits (up to 1 closest results for each mass)

Elements Used:

C: 0-23 H: 0-50 N: 0-5 O: 0-3

WB-ZHANG

ECUST institute of Fine Chem

12-Dec-2013

19:25:39

1: TOF MS ES+

9.20e+003

ZWB-THY-TSSP-NH2 19 (0.205) Cm (12:24)

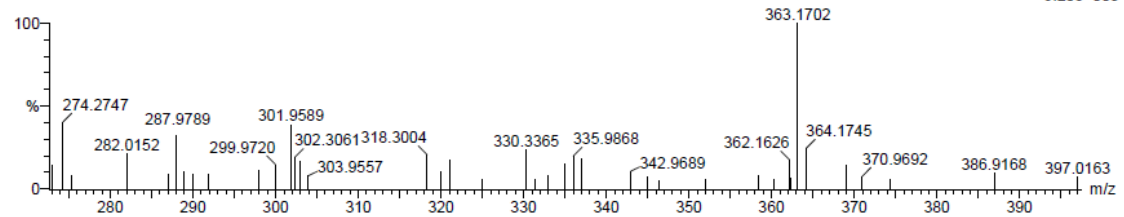

Minimum: -1.5  
Maximum: 30.0 50.0 100.0

| Mass     | Calc. Mass | mDa  | PFM  | DBE  | i-FIT | i-FIT (Norm) | Formula       |
|----------|------------|------|------|------|-------|--------------|---------------|
| 363.1702 | 363.1709   | -0.7 | -1.9 | 12.5 | 9.3   | 0.0          | C22 H23 N2 O3 |

**Figure S2.**  $^1\text{H}$  NMR,  $^{13}\text{C}$  NMR and HRMS spectra of TSSP-NH<sub>2</sub>.

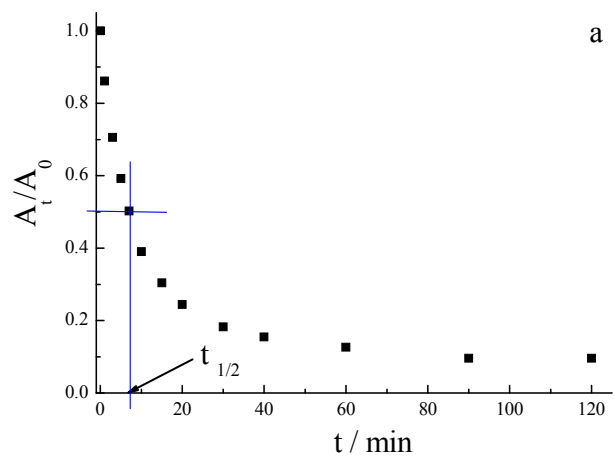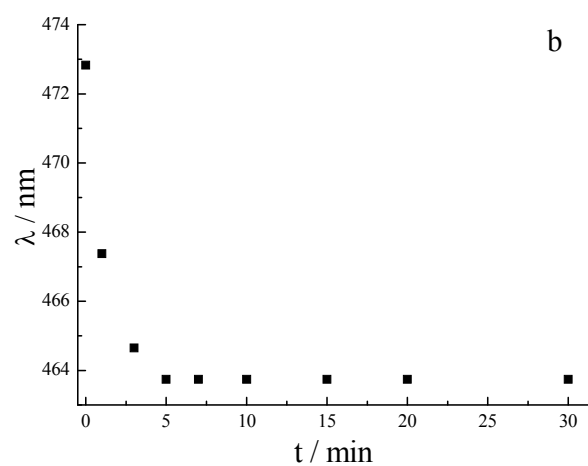

**Figure S3.** The  $A_t/A_0$  plot of **TSSP-N<sub>3</sub>** vs time in the presence of 50 equiv. of sulfite (a) and the absorption wavelength change of **TSSP-N<sub>3</sub>** as a function of time in the presence of 10 equiv. of sulfide (b) in PBS-CTAB (1 mM) system.  $A_t$  and  $A_0$  are the absorbance at 475 nm at  $t$  and 0 time, respectively. [**TSSP-N<sub>3</sub>**]= 2  $\mu$ M, [sulfite] = 100  $\mu$ M, [sulfide] = 20  $\mu$ M, 20 mM PBS, pH = 7.4, 25°C.

Elements Used:  
C: 0-25 H: 0-30 N: 0-2 O: 0-6 S: 0-1  
WB-ZHU

ECUST institute of Fine Chem

08-Jan-2014  
23:01:40  
2: TOF MS ES-  
1.13e+003

ZWB-THY-NH2-SO3 3 (0.196) Cm (1:5)

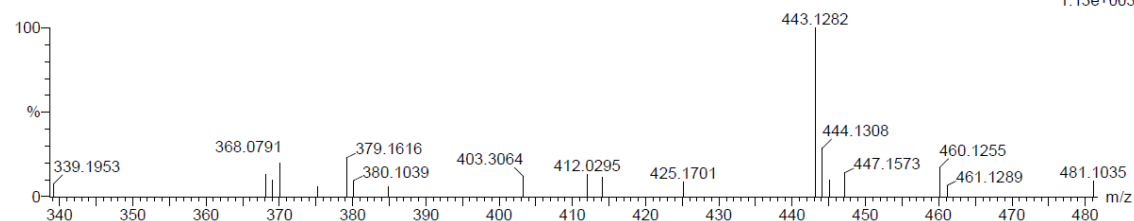

Minimum: -1.5  
Maximum: 100.0

| Mass     | Calc. Mass | mDa | PPM | DBE  | i-FIT | i-FIT (Norm) | Formula         |
|----------|------------|-----|-----|------|-------|--------------|-----------------|
| 443.1282 | 443.1277   | 0.5 | 1.1 | 12.5 | 6.9   | 0.0          | C22 H23 N2 O6 S |

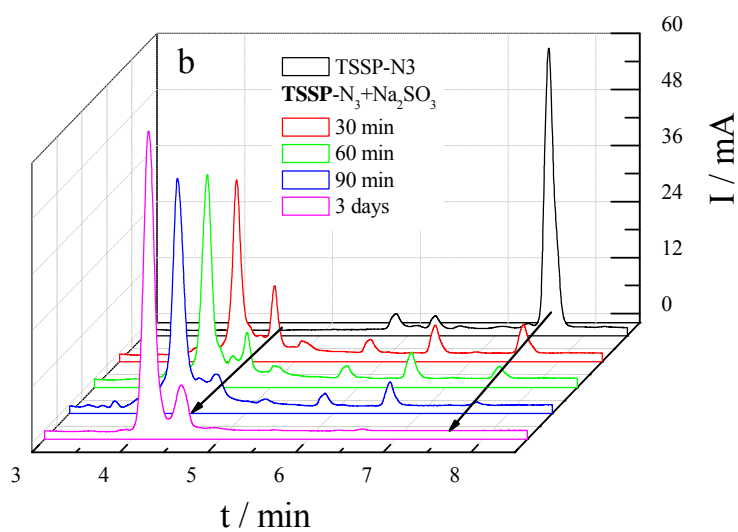

**Figure S4.** HR-MS and HPLC spectra of the reaction solution between **TSSP-N<sub>3</sub>** and sulfite (A solution of 31 mg Na<sub>2</sub>SO<sub>3</sub> in 2 mL H<sub>2</sub>O was added dropwise to a solution of 10 mL EtOH containing 15 mg of **TSSP-N<sub>3</sub>**. The mixture was refluxed for three days), detected at 410 nm.



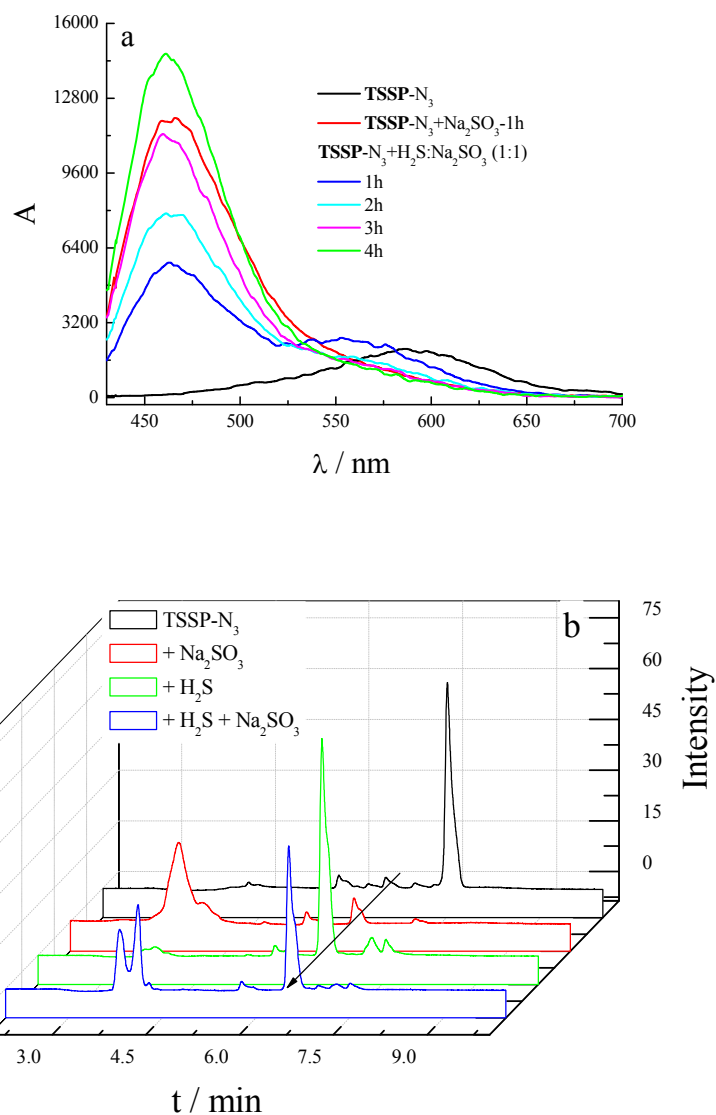

**Figure S5.** Time-dependent emission spectra of **TSSP-N<sub>3</sub>** coexisted with 1:1 sulfide:sulfite (a), and HPLC spectra (b) of the mixtures of **TSSP-N<sub>3</sub>** with sulfite (red), sulfide (green), sulfite:sulfide (1:1, blue) after 1h in PBS-CTAB (1 mM) system. [**TSSP-N<sub>3</sub>**] = 15 μM, [sulfide]=[sulfite] = 750 μM. 20 mM PBS, pH = 7.4, detection wavelength = 410 nm, 25°C.

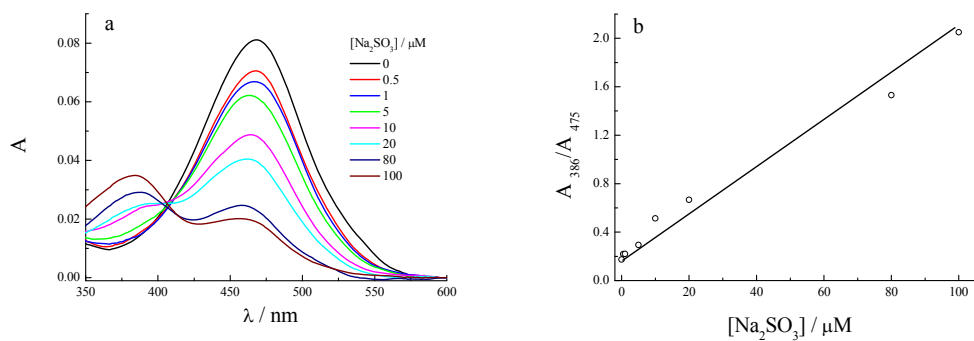

**Figure S6.** The absorption spectra(a) of **TSSP-N<sub>3</sub>** with different concentrations of sulfite after 1 h, and the ratio of absorbances at 386 nm and 475 nm (b,  $A_{386}/A_{475}$ ) as a function of sulfite concentration. 20 mM PBS, pH 7.4, 25 °C, [CTAB] = 1 mM, [TSSP-N<sub>3</sub>] = 2 μM.

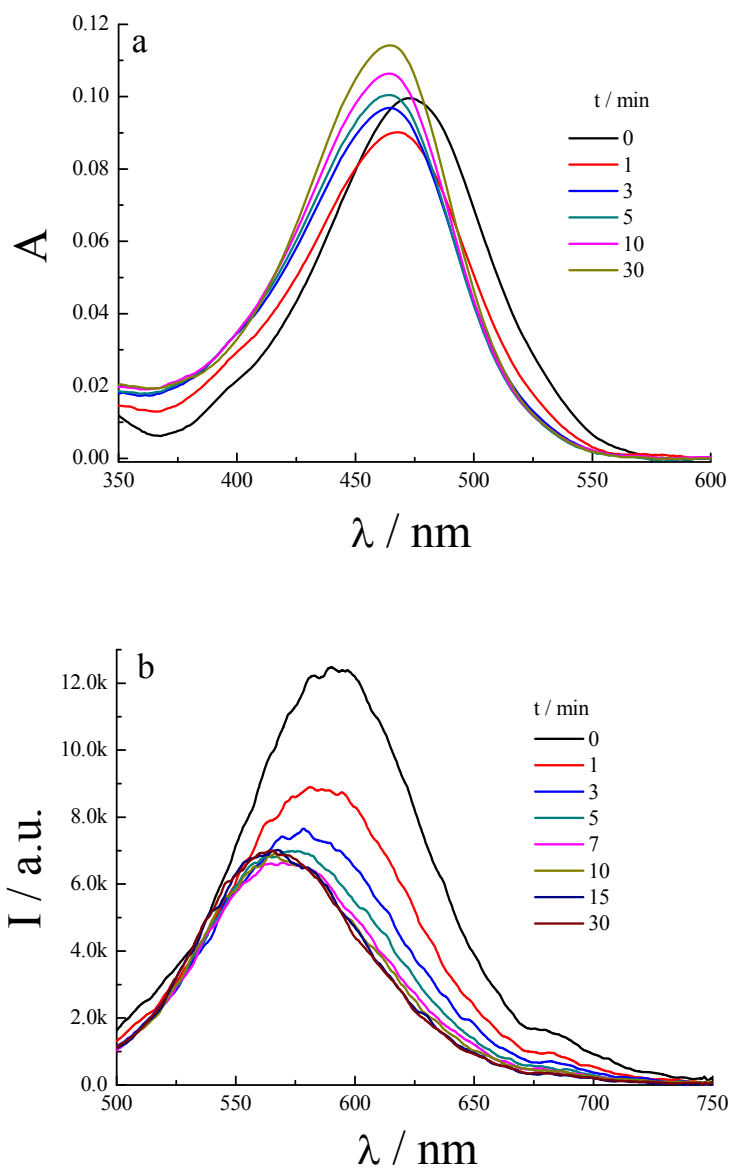

**Figure S7.** Time-dependent absorption and emission spectra of TSSP-N<sub>3</sub> in PBS-CTAB (1 mM) system. [TSSP-N<sub>3</sub>] = 2  $\mu$ M, [sulfide] = 20  $\mu$ M,  $\lambda_{\text{ex}}$  = 410 nm, 20 mM PBS, pH = 7.4, 25°C.

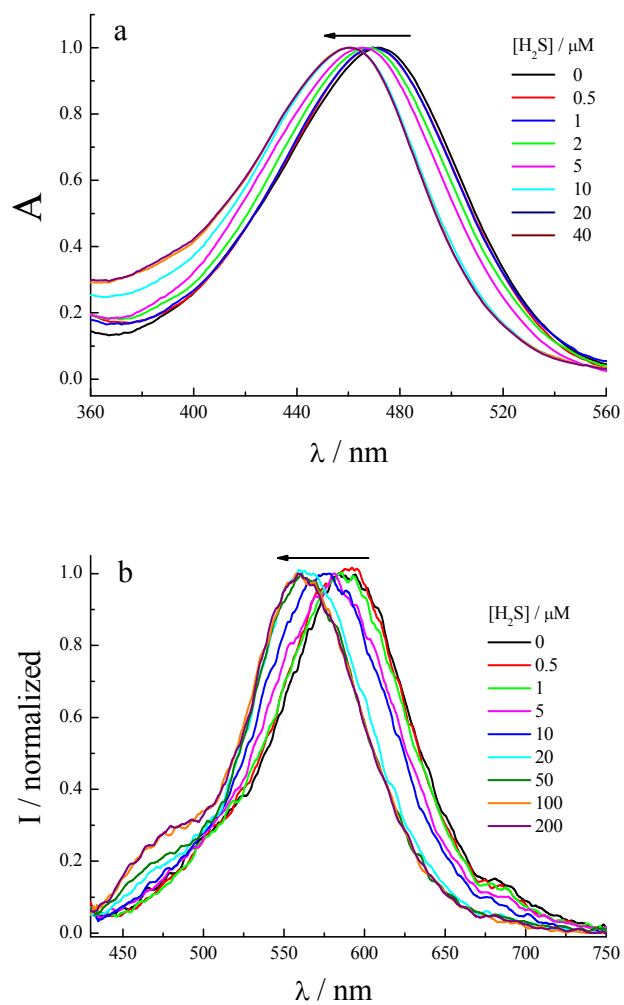

**Figure S8.** Normalized absorption (a) and emission (b) spectra of TSSP-N<sub>3</sub> (2 μM) in the presence of different concentrations of sulfide after 10 min in PBS-CTAB (1 mM) system. 20 mM PBS, pH 7.4, 25°C, excited at 410 nm.

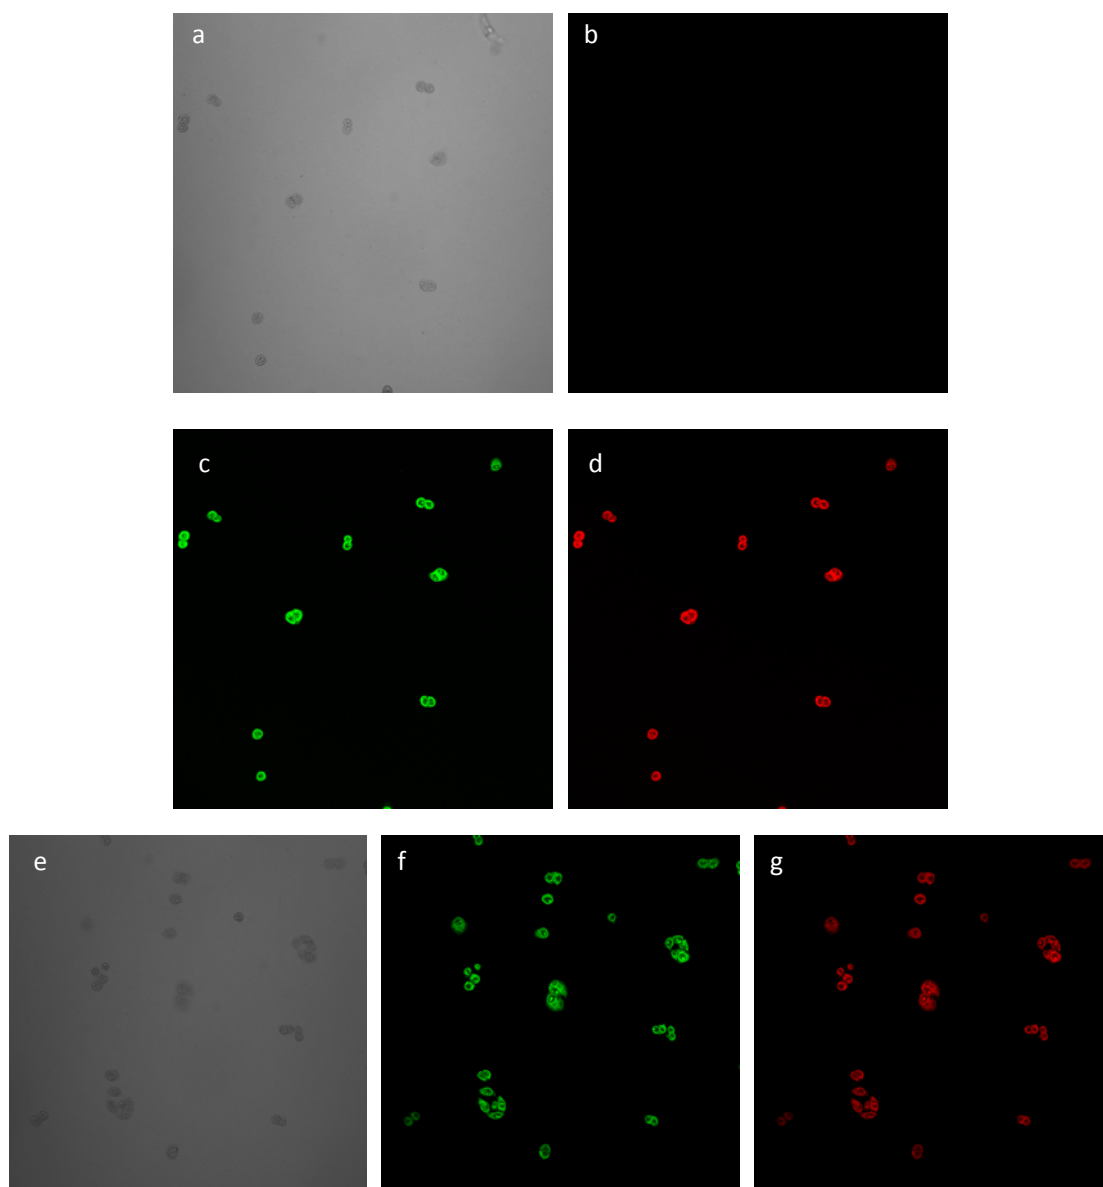

**Figure S9.** Confocal fluorescence (b-d, f-g) and bright-field (a, e) images of living HeLa cells incubated with **TSSP-N<sub>3</sub>** (5  $\mu$ M) and CTAB (1 mM) for 60 min. (a-d): excited at 404 nm; (e-g): excited at 488 nm; (b): blue channel; (c, f): green channel; (d, g): red channel.

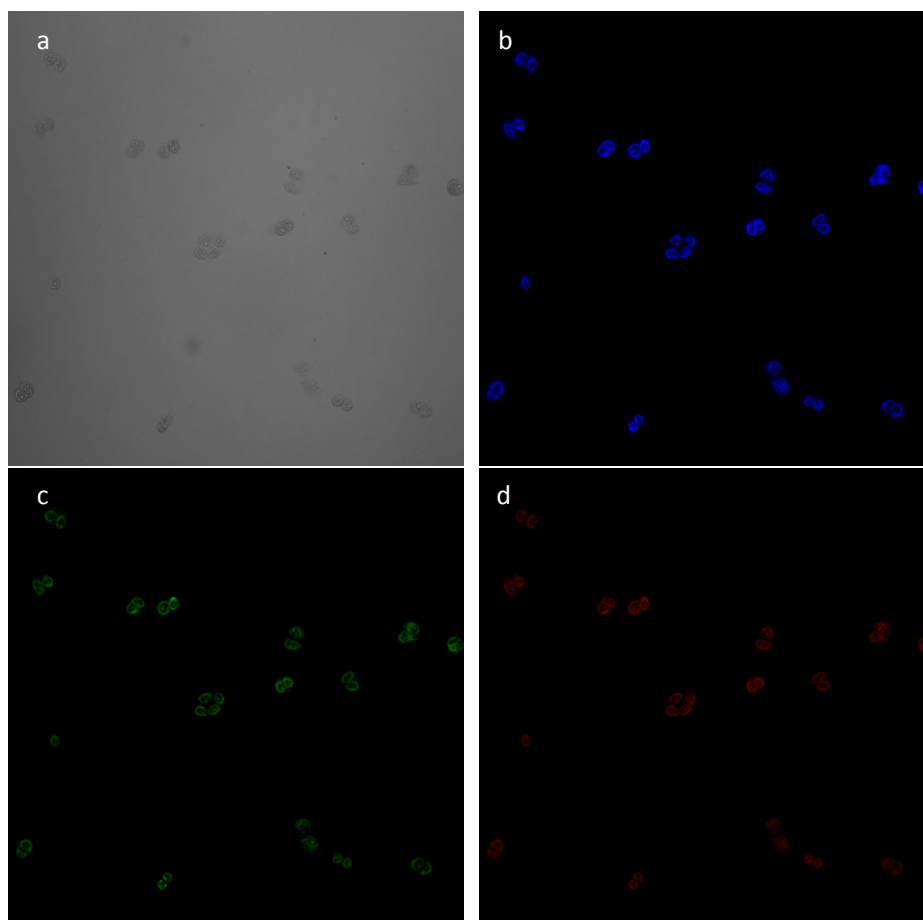

**Figure S10.** Confocal fluorescence (b-d) and bright-field (a) images of living HeLa cells preincubated with 100  $\mu\text{M}$  sulfite followed by incubated with TSSP-N<sub>3</sub> (5  $\mu\text{M}$ ) and CTAB (1 mM) for 60 min. Excited at 404 nm; (b): blue channel; (c): green channel; (d): red channel.

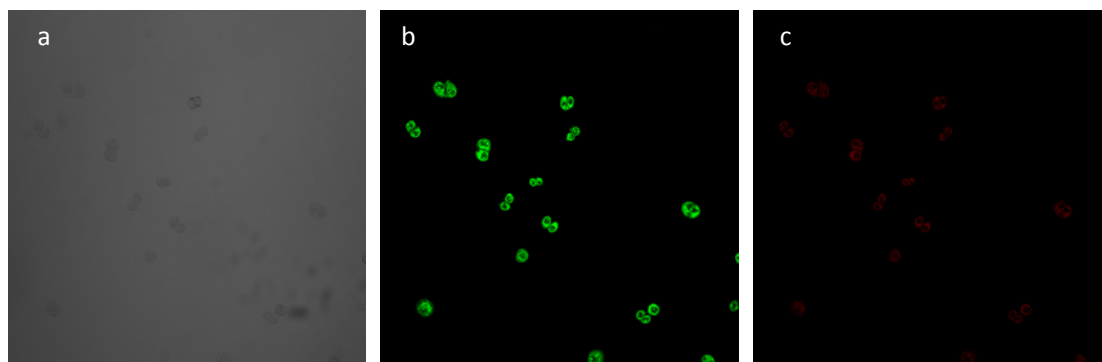

**Figure S11.** Confocal fluorescence (b-c) and bright-field (a) images of living HeLa cells incubated with **TSSP-N<sub>3</sub>** (5  $\mu$ M) and CTAB (1 mM) for 60 min pretreated with 100  $\mu$ M sulfide. Excited at 488 nm; (b): green channel; (c): red channel.
